# Supplementary material
Source: ML conference proceedings conference paper supplement (https://aclanthology.org/D18-1442)
Supplement: Attachment [file D18-1442.Attachment.pdf]

## A Appendix

### Gold Summary:

@entity22 is home to a grand array of wildlife , from birds of prey to dolphins. you can glimpse the most magical of marine mammals at @entity20. you can also glimpse the elusive red squirrel at @entity104 in @entity105.

### ITS:

you don't need to go to the @entity2 savannahs or the @entity4 rainforests to find wild life - @entity5 on a friday will do perfectly well. miracle mammals : you can spot dolphins at @entity20 - the dolphin capital of @entity22 dolphins where: @entity25 , @entity20 , @entity26. details: stop off to see us : the red squirrels at @entity100 have hung on against all the odds red squirrels where : @entity104 , @entity105

### Hybrid MemNet:

you don't need to go to the @entity2 savannahs or the @entity4 rainforests to find wild life - @entity5 on a friday will do perfectly well. miracle mammals : you can spot dolphins at @entity20 - the dolphin capital of @entity22 dolphins where : @entity25 , @entity20 , @entity26. this is the dolphin capital of @entity22.

Table 1: Summaries produced by Our model ITS and Hybrid MemNet for a DailyMail test article. Gold summary is the human-authored highlight in the original corpus.
